1 **Varying thermal exposure, host-plant traits and oviposition behaviour**  
2 **across vegetation ecotones**

3

4 Maria Vives-Inglà<sup>1,2\*</sup>, Javier Sala-García<sup>1</sup>, Constantí Stefanescu<sup>3,1</sup>, Josep Peñuelas<sup>1</sup>, Jofre  
5 Carnicer<sup>1,2\*</sup>

6 <sup>1</sup> CREA, E08193 Bellaterra (Cerdanyola del Vallès), Catalonia, Spain

7 <sup>2</sup> Department de Biologia Evolutiva, Ecologia i Ciències Ambientals, Facultat de Biologia, Institut  
8 de Recerca de la Biodiversitat (IRBio), Universitat de Barcelona, 08028 Barcelona, Catalonia,  
9 Spain

10 <sup>3</sup> Granollers Natural Sciences Museum, Granollers, Barcelona, Spain

11

12 \*corresponding authors

13 Maria Vives-Inglà

14 m.vives@creaf.uab.cat

15 Jofre Carnicer

16 jofre.carnicer@ub.edu

17

18 **ABSTRACT**

19 Vegetation cover generates local microclimatic gradients in the understorey, being especially  
20 pronounced at narrow ecotones linking open and forested habitats (*open–closed ecotones*).  
21 They provide key habitats for multiple insect communities and may largely determine the  
22 exposure of herbivorous insects to the increasing impacts of climate change. We report parallel  
23 measurements of microclimatic variables, multiple host-plant traits, and oviposition behaviour  
24 in Mediterranean populations of two *Pieris* butterflies across ecotones of vegetation cover.  
25 Open microhabitats were significantly warmer, drier, and more exposed to thermal  
26 amplification, which increased temperatures to values affecting insect larval survival. Host plants  
27 advanced their reproductive phenology and were shorter. Open microhabitats also inhibited the  
28 development of shade-adapted plants (e.g. *Alliaria petiolata*), decreasing fruit production. In  
29 contrast, the reproduction of sun-adapted host plants (e.g. *Lepidium draba*) was vigorous in the  
30 open microhabitats and completely inhibited in closed microhabitats, which were exclusively  
31 inhabited by non-reproductive ramets. Key plant traits for the selection of oviposition sites by  
32 butterflies, such as foliar water and chlorophyll contents, varied significantly across the open–  
33 closed ecotones. Foliar water content was always lower in the open microhabitats, whereas  
34 foliar chlorophyll gradients differed between sun- and shade-adapted plants. The oviposition  
35 behavior of *Pieris* butterflies across the ecotones differed significantly between the  
36 thermotolerant species (*P. rapae*, preferentially selecting open microhabitats) and the  
37 thermosensitive species (*P. napi*, selecting microhabitats protected by vegetation cover),  
38 matching the values of thermal susceptibility estimated from parallel heat tolerance assays of  
39 the populations. The larvae of the thermotolerant *Pieris* species grew under completely different  
40 thermal conditions due to differential microhabitat selection, indicating marked interspecific  
41 differences in thermal exposure (5–10 °C). These results suggest that the impacts of global  
42 warming in these communities will likely be mediated by open–closed ecotones, which  
43 determine pronounced local variability in thermal exposure, oviposition placement, and host-  
44 plant traits affecting larval performance in summer.

45

46 *Keywords:* Ecotone, thermal amplification, thermal buffering, microclimates, microhabitat use,  
47 oviposition, sun-adapted plants, shade-adapted plants, climate change, drought.

48 1. INTRODUCTION

49 The effects of climate change on natural systems have been consistently detected in many  
50 regions of the world and are predicted to increase as anthropogenic warming continues to  
51 intensify in the coming decades (Hoegh-Guldberg et al., 2018; IPCC, 2014; Parmesan, 2006;  
52 Parmesan & Yohe, 2003; Urban, 2015; Walther et al., 2002). Reported impacts of climate change  
53 on organisms, however, include a wide array of responses involving processes at multiple scales  
54 and levels of ecological organization (Moritz & Agudo, 2013; Parmesan, 2006; Scheffers et al.,  
55 2016). Climatic exposure in a habitat is due to the interaction of large-scale climatic conditions  
56 with site-specific geophysical attributes. Topography, vegetation structure, soil composition,  
57 and even surface roughness can locally modify macroclimatic conditions and generate a mosaic  
58 of microclimates (Bramer et al., 2018; De Frenne et al., 2013, 2019; Pincebourde, Murdock,  
59 Vickers, & Sears, 2016; Woods, Dillon, & Pincebourde, 2015). For example, local temperature  
60 gradients within a few meters can parallel gradients at larger, geographical scales (Lenoir et al.,  
61 2013; Pincebourde et al., 2016; Scherrer & Körner, 2010). Thermal variability in microhabitats is  
62 thus noteworthy, because the experience of climate by organisms ultimately depends on the  
63 way in which they sample these microclimatic mosaics (Bennett, Severns, Parmesan, & Singer,  
64 2015; Pincebourde et al., 2016; Woods et al., 2015).

65 Microclimatic heterogeneity contributed to the occurrence of microrefugia in the past  
66 (Dobrowski, 2011) and may similarly play a key role in mediating the effects of current climate  
67 change on ecological systems, as several studies have already suggested (Bennett et al., 2015;  
68 Bonebrake, Boggs, Stamberger, Deutsch, & Ehrlich, 2014; Carnicer et al., 2019, 2017; De Frenne  
69 et al., 2013; Hindle, Kerr, Richards, & Willis, 2015; Kearney, Shine, & Porter, 2009; Lenoir et al.,  
70 2013; Pincebourde et al., 2016; Scherrer & Körner, 2010; Suggitt et al., 2018; Sunday et al., 2014;  
71 Woods et al., 2015). For example, De Frenne et al. (2013) recently found that an increase in  
72 warm-adapted plant species in the understorey of temperate forests of the northern  
73 hemisphere was being attenuated in forests whose canopies had become denser. This result  
74 was attributed to the buffering against the impacts of macroclimatic warming provided by  
75 canopy closure, lowering ground-layer temperatures and increasing relative air humidity and  
76 shade. In addition to acting as a buffer for the understorey, forest cover can also protect insect  
77 communities that rely on these host plants. Limited thermal buffering of vegetation in the  
78 Mediterranean biome was identified as a key factor exacerbating the decline of a population of  
79 a drought-sensitive species (Carnicer et al., 2019). Other interacting negative factors included  
80 the reduction of host-plant quality due to the seasonal progression of plant phenology, the  
81 amplification of foliar temperatures linked to reduced plant transpiration, and increasing

82 impacts of summer drought at the multidecadal scale (Carnicer et al., 2019). Detailed  
83 descriptions of the effects of vegetation-cover gradients on multiple host-plant traits and  
84 thermal microconditions, however, are currently lacking for most interactions between plants  
85 and animals.

86 We determined whether local spatial gradients in vegetation cover (hereafter open–closed  
87 ecotones) induced microclimatic heterogeneity and plasticity of host-plant traits related to plant  
88 quality for insect hosting and herbivory. We also assessed whether microhabitat variation could  
89 be associated with different oviposition behaviour of butterflies. The selection of oviposition  
90 sites may have important implications for offspring survival and performance by strongly  
91 influencing the environment and resource availability before and after hatching (Gibbs & Van  
92 Dyck, 2009). Numerous factors can alter oviposition behaviour, such as temperature, the state  
93 and distribution of host plants, and the surrounding vegetation (Gibbs & Van Dyck, 2009). For  
94 example, temperature can influence the selection of microhabitats to lay eggs by directly  
95 enhancing oviposition and/or by modifying the amount of time and the number of suitable  
96 locations that are available for egg-laying. The development of eggs and larvae can be also  
97 affected by microhabitat conditions. In addition to directly affecting growth, microclimatic  
98 variation can also induce plastic shifts in host-plant quality (Merckx, Serruys, & Van Dyck, 2015),  
99 which can synergistically act on larval development (Bauerfeind & Fischer, 2013). All these  
100 processes have been extensively studied but have usually been treated separately or only a few  
101 habitat variables and/or host-plant traits have been considered (see Gibbs & Van Dyck, 2009 for  
102 a review). Integrative studies with comprehensive, parallel measurements of multiple host-plant  
103 traits, oviposition behaviour, and microclimatic variables across local spatial gradients are thus  
104 warranted. We studied the influence of open–closed ecotones on two host plants, *Alliaria*  
105 *petiolata* (M. Bieb.) Cavara & Grande and *Lepidium draba* L., in two Mediterranean sites, both  
106 harbouring populations of the butterflies *Pieris napi* L. 1758 and *P. rapae* L. 1758 to integrate  
107 these processes in a single study and to describe their simultaneous variation. More specifically,  
108 we quantified the seasonal dynamics (objective *i*) and the spatial variation across open–closed  
109 ecotones (objective *ii*) of key microhabitat variables:

- 110 a. microclimatic conditions where the two plant species that host *P. napi* and *P.*  
111 *rapae* grow,
- 112 b. host-plant phenology and reproductive output, and
- 113 c. host-plant morphological and physiological traits influencing butterfly  
114 oviposition.

115 We then determined whether the patterns of spatial variation were maintained across seasons  
116 and host-plant phenological stages (objective *iii*). Finally, in objective *iv* we tested whether the  
117 two *Pieris* species, which differ in habitat affiliations, selected different microhabitats from  
118 open–closed ecotones to oviposit and had different larval thermal susceptibilities.

119

## 120 2. MATERIALS & METHODS

### 121 a. Study system

122 We studied two cohorts of the host plants *A. petiolata* and *L. draba* to quantify the effects of  
123 vegetation cover on the variation of local microclimatic conditions and host-plant traits. The two  
124 species were distributed at two different sites (*A. petiolata* at site 1 and *L. draba* at site 2)  
125 belonging to different protected areas of the north-eastern Iberian Peninsula, 50 km from each  
126 other (Figs. S1 and S2). Both sites are along two transects that have long been monitored by the  
127 Catalan Butterfly Monitoring Scheme (CBMS, Pollard & Yates, 1993; Stefanescu, 2000) and  
128 contain abundant and intensively studied populations of the butterflies *P. napi* and *P. rapae*  
129 (Carnicer et al., 2019). Site 1 is in a mid-elevation area (539 m a.s.l.; Can Jordà, La Garrotxa  
130 Volcanic Zone Natural Park) populated by Mediterranean, sub-Mediterranean, and Eurosiberian  
131 vegetation. Site 1 is a heterogeneous landscape of evergreen and deciduous woodlands  
132 (including holm oak, deciduous oaks, and beech as the main arboreal species), meadows,  
133 pastures, arable land, and natural ponds. Site 2 is in a lowland coastal wetland (Aiguamolls de  
134 l'Empordà Natural Park) surrounded by riparian deciduous forests, bush and bramble thickets,  
135 reed beds, and irrigated cropland.

136 We studied the oviposition behaviour of closely related *P. napi* and *P. rapae*. The green-veined  
137 white butterfly (*P. napi*) is a Holarctic species tightly linked to humid habitats. It can be found  
138 throughout Catalonia, except in the driest areas (Vila, Stefanescu, & Sesma, 2018). It is more  
139 locally distributed in lowlands, and declining trends among these populations have been  
140 associated with the increasing impacts of summer drought (Carnicer et al., 2019). The small  
141 white butterfly (*P. rapae*) is a more generalist, thermophilous, and ubiquitous species. It is very  
142 common in agricultural and ruderal areas, and its populations tend to be stable or slightly  
143 increasing (Vila et al., 2018). Both species lay individual eggs on Brassicaceae species. *Pieris*  
144 *rapae* uses a greater diversity of host plants (both natural and cultivated), but *P. napi* restricts  
145 its oviposition to several crucifers common in humid habitats (e.g. *A. petiolata*, *Brassica nigra*  
146 (L.) W. D. J. Koch, *L. draba*, and *Cardamine* spp.; Vila et al., 2018; Carnicer et al. 2019).

147 *A. petiolata* and *L. draba* are both used as host plants by the two butterfly species and are  
148 dominant at their study sites. *Alliaria petiolata* is a biennial herb adapted to shade and is thus  
149 common in damp soils at the edges of deciduous forests (de Bolós & Vigo, 1990) but can also  
150 grow in highly contrasted environmental conditions, exhibiting considerable plasticity in  
151 different habitats (Cavers, Heagy, & Kokron, 1979). It has heart-shaped leaves 2–20 cm in  
152 length. Seedlings emerge during spring (even from late spring to early summer) and persist as  
153 rosettes throughout the first year, until the next growing season when inflorescences are  
154 initiated. Fruits are ascendant siliques 20–70 mm long. We studied *L. draba*, which is a  
155 perennial, rhizomatous, and sun-adapted herb usually found in ruderal areas and field margins  
156 with deep soil, in the lowlands (site 2) (de Bolós & Vigo, 1990). Its leaves are ovate, about 1.5–  
157 10 cm long. Flowers are grouped in corymbs and produce indehiscent silicles. Its extensive,  
158 multi-branched rhizomes are notably capable of producing many new shoots, which can  
159 develop into large monocultural stands (Francis & Warwick, 2008).

160 b. Microenvironmental and host-plant variation

161 The landscape mosaic of the two study sites was characterised by spatial gradients of vegetation  
162 cover between open and closed microhabitats and their transition zones (*open–closed*  
163 *ecotones*). We monitored cohorts of 152 individuals of *A. petiolata* and 353 individuals of *L.*  
164 *draba* distributed across the ecotones. Each individual was assigned to one of four categories of  
165 microhabitats for assessing the influence of vegetation cover on the variabilities of the  
166 microclimates and host-plant traits: open (O), semi-open (SO), semi-closed (SC), and closed (C).  
167 These categories were based on detailed measurements of the dynamics of vegetal cover  
168 conducted at the sites (Text S1 and Figs. S2 and S3). Both cohorts included individuals from the  
169 four types of microhabitats.

170 We continuously monitored 19 host-plant traits and microclimatic conditions in the *A. petiolata*  
171 and *L. draba* cohorts to quantify their seasonal variation (Table 1). We randomly selected 12  
172 host plants for each cohort each monitoring day, with three samples for each category of  
173 microhabitat (O, SO, SC, and C). The selection procedure ensured that plants were randomly  
174 chosen without repetition to avoid pseudoreplication. A representative basal, medial, and apical  
175 leaf was chosen for each plant, and its state (green/senescent) was recorded. Microclimatic and  
176 host-plant measurements were conducted from March to October 2017, repeating the same  
177 sampling protocol every 15 days in each microhabitat.

178 The volumetric water content of the soil (% by volume, Table 1 variable 1) was measured at  
179 three points near each plant using a DELTA-T SM150 (Delta-T Devices Ltd, Cambridge, UK) soil-

180 moisture sensor kit. A penetration thermometer (HANNA HI98509, Hanna Instruments Ltd,  
181 Eibar, Spain) was used for measuring soil temperature at a depth of 10 cm (Table 1 variable 2).  
182 Soil surface temperature (Table 1 variables 3, 4), microhabitat air temperature (Table 1 variable  
183 5), and foliar surface temperature (Table 1 variables 6, 7) were measured using a wire K-type  
184 thermocouple probe (Omega SC-TT-KI-30-1M, Omega Engineering Ltd, Manchester, UK)  
185 attached to a hand-held thermocouple thermometer (Omega HH503, Omega Engineering Ltd,  
186 Manchester, UK, and HANNA HI935005N, Hanna Instruments Ltd, Eibar, Spain). Average  
187 measurements (at least three records) were kept. The temperatures were measured between  
188 10:00 and 16:00, and the time and wind and radiation conditions were recorded. Soil surface  
189 temperature was measured near the host plants, replicating it in areas exposed to direct solar  
190 radiation and in shaded areas. Air temperature was measured at a height of 1 m immediately  
191 above the host plant. Foliar temperature was measured on the upper and lower surfaces. We  
192 calculated foliar thermal amplification as the difference between foliar temperature and the  
193 maximum recorded environmental temperature of the corresponding day to compare foliar  
194 thermal microconditions with standard measurements of the local weather. Daily records of  
195 environmental temperature were obtained from two meteorological stations near the study  
196 sites and within the same elevational range (Fig. S1). Additionally, microclimatic conditions were  
197 continuously recorded with standalone data loggers (Lascar Electronics EL-USB-2-LCD, Salisbury,  
198 UK). Eight data loggers were placed 25 cm above the soil near the host plants in each  
199 microhabitat type and site (see below). The sensors were programmed to measure temperature  
200 (°C) and relative humidity (RH, %) hourly.

201 We assessed plant phenological status (Table 1 variable 8) by classifying the individuals in one  
202 of four phenological stages: early vegetative (spring rosettes and young shoots before budding),  
203 reproductive (plants with buds, flowers, and/or fruits), senescent, and late vegetative (late *A.*  
204 *petiolata* seedlings and *L. draba* resprouts emerging in summer). The length, width, and  
205 chlorophyll content (Table 1 variables 10–12) of each leaf were measured. Chlorophyll content  
206 was estimated as the mean of three measurements from a MINOLTA SPAD-502 (Konica Minolta  
207 Sensing, Valencia, Spain) chlorophyll meter. Finally, leaves were severed and immediately  
208 weighed (fresh weight, FW; Table 1 variable 13) using a Pesola PJS020 Digital Scale (PESOLA  
209 Präzisionswaagen AG, Schindellegi, Switzerland) for calculating water content. The leaves were  
210 oven-dried in the laboratory at 60 °C for two days to a stable weight (dry weight, DW; Table 1  
211 variable 14). The ratio of foliar water content (to DW, Table 1 variable 15) was defined as (FW-  
212 DW)/DW. The ratio DW/foliar length was calculated as a proxy for foliar density (Table 1 variable  
213 16).

214 c. Host-plant reproductive output

215 Fruit production was measured in each microhabitat type as an indicator of differential host-  
216 plant fitness. A minimum of seven individuals were sampled for each microhabitat type. The  
217 number of fruits (siliques for *A. petiolata* and silicules for *L. draba*) per plant was counted (Table  
218 1 variable 17). For *A. petiolata*, we also measured host-plant height and silique length (Table 1  
219 variable 18). For *L. draba*, we additionally conducted a census of newly emerging resprouts. The  
220 density of resprouts was quantified beginning in July when the first shoots emerged from  
221 resprouting rhizomes (Table 1 variable 19). Five 25-cm quadrats were randomly placed in each  
222 microhabitat type. The total number of resprouts per unit area were counted, and three  
223 resprouts were then randomly selected for measuring their heights (Table 1 variable 20) and  
224 counting their total numbers of leaves (Table 1 variable 21).

225 d. Oviposition behaviour

226 As previously stated, *P. napi* and *P. rapae* are usually associated with different habitat types (*P.*  
227 *napi* with humid areas and *P. rapae* with open and dry areas). Microhabitat use by these species  
228 and the interactions with vegetation structure nevertheless remain poorly described and may  
229 vary depending on the kind of behaviour (e.g. basking sites do not coincide with oviposition  
230 sites) and on the time of day and season (Dennis, 2004). We assessed whether the differences  
231 in broad habitat preferences between the species led to different microhabitat selections for  
232 oviposition across open–closed ecotones. We tested this hypothesis by carrying out censuses of  
233 oviposition behaviour at the two study sites. Females were followed for replicated periods of 45  
234 min to count the number of eggs they laid and record the microenvironmental conditions. The  
235 censuses fully covered the entire daily period of flight activity, between 9:00 and 19:00, and  
236 were conducted in summer 2017 (lowland site, two days) and 2018 (mid-elevation site, four  
237 days). They were simultaneously performed in the various microhabitat types, carefully  
238 balancing the time spent in each type. Oviposition was considered to occur when females that  
239 landed on a leaf were observed to curl their abdomen and remain in this position for at least  
240 three seconds. Species, hour, egg position (upper vs lower surface of leaves), and microhabitat  
241 type were recorded. The temperature of the leaves where eggs were laid was also recorded  
242 when possible using a thermocouple (see previous sections) immediately after the female left  
243 the plant. Additional ovipositions during host-plant monitoring were also integrated into the  
244 final data set. Table S1 contains a summary of the census variables and the number of females  
245 and eggs. Mean temperature between 13:00 and 17:00 (when 85% of ovipositions occurred)  
246 recorded with the data loggers from June to September was calculated for each microhabitat



247 type and site to assess the thermal conditions during oviposition. We also assessed mean  
248 thermal amplification, defined as the difference between the mean daily temperatures from the  
249 microclimatic data loggers and the temperatures from standardised local meteorological  
250 stations.

251 e. Ecophysiological assays of heat tolerance

252 If as hypothesized *P. napi* oviposits in more closed and buffered microhabitats than does *P.*  
253 *rapae*, *P. napi* larvae may be more susceptible than *P. rapae* larvae to thermal stress. Heat  
254 tolerance assays determining the time to thermal death can predict from first principles how  
255 thermal stress (depending on both its intensity and duration) can affect larval survival (Deutsch  
256 et al., 2008; Rezende, Castañeda, & Santos, 2014). We implemented a static heat tolerance  
257 experiment using *P. napi* and *P. rapae* larvae to determine whether the two species had different  
258 survival responses to thermal stress. Text S2 provides a more detailed description of the  
259 experiments.

260 f. Data analyses

261 All data were analysed using R 3.6.1 (R Core Team, 2019). We used local polynomial regressions  
262 between each variable and Julian day to assess the temporal dynamics of the  
263 microenvironmental conditions and host-plant traits (objective *i*) (Table S2). The regression fit  
264 was applied separately to each microhabitat type (O, SO, SC, and C) at each site. The trends for  
265 the host-plant variables were grouped by plant developmental stage (i.e. flowering spring plants  
266 vs newly emerged or non-flowering summer individuals). Weekly abundances of *P. napi* and *P.*  
267 *rapae* were obtained from the CBMS transects at both sites (2017). An index of butterfly  
268 abundance for each recording day was calculated as the number of counts divided by the length  
269 of the transect (in km). A local polynomial regression analysis against Julian day (neighbourhood  
270 parameter  $\alpha = 0.25$ ) was then applied to determine the phenologies of both butterflies at both  
271 sites.

272 Each variable was modelled against microhabitat type for describing the variation of  
273 microenvironmental conditions and host-plant traits across open–closed ecotones at each site  
274 (objectives *ii* and *iii*). An ANOVA was applied followed by a post-hoc Tukey HSD test calculated  
275 using the *emmeans* package (Lenth, 2019). The analyses were performed for the entire sampling  
276 period (objective *ii*) and for specific phenological stages and seasons (objective *iii*). We  
277 quantified the date for the onset of flowering to assess phenological differences across the  
278 open–closed ecotones. Changes in the daily proportion of individuals in each microhabitat type  
279 that were at their reproductive stage were assessed using the data from the phenological

280 censuses (Table 1 variable 8). A prediction curve and its 95% confidence interval were obtained  
281 from the fit of a local polynomial regression between the proportion of reproductive individuals  
282 and Julian day (neighbourhood parameter  $\alpha = 0.5$ , Table S3). The onset of flowering for each  
283 microhabitat type and site was calculated as the first Julian day when 50% of the plants were  
284 flowering.

285 We applied generalised linear mixed models (GLMMs) to determine whether the two butterfly  
286 species selected different microhabitats to oviposit (objective *iv*) (Bolker et al., 2009; Zuur, Ieno,  
287 Walker, Saveliev, & Smith, 2009). The number of females ovipositing was used as the response  
288 variable. The type of microhabitat, the species, their interaction, and census duration were  
289 added as fixed factors, and Julian day and time of the census (9:00–11:00, 11:00–13:00, 13:00–  
290 15:00, 15:00–17:00, and 17:00–19:00) were treated as random factors. The model was fitted  
291 using the `bglmer` function of the *blme* package (Chung, Rabe-Hesketh, Dorie, Gelman, & Liu,  
292 2013) by maximum likelihood (Laplace approximation), a Poisson error distribution with a log  
293 link function and imposing zero-mean normal priors on the fixed effects to avoid complete  
294 separation (Bolker, 2015). *p* values for the fixed effects were calculated by parametric  
295 bootstrapping using the *afex* package (Singmann, Bolker, Westfall, & Aust, 2019). Finally, the  
296 predicted distribution of ovipositing females during a day was also estimated from the  
297 conditional modes of time grouping factor. Data from both sites were compiled into a single  
298 data set and treated together, because they had similar distributions of eggs across the open–  
299 closed ecotones. The number of eggs was not used as a response variable to avoid  
300 pseudoreplication linked to differences in oviposition behaviour between the species (e.g. *P.*  
301 *napi* lays more eggs than *P. rapae* before switching to new hosts, Friberg & Wiklund, 2019).

302

### 303 3. RESULTS

#### 304 a. Seasonal dynamics of microclimatic conditions and host-plant traits (objective *i*)

305 The annual cycles of variation in microclimatic conditions, host-plant traits, and butterfly  
306 phenologies are shown in Fig. 1, highlighting the main differences between the C and O  
307 microhabitats. The thermal variables (Table 1 variables 2–7) were strongly correlated ( $p = 0.0042$   
308  $\pm 0.0198$  and  $R^2 = 0.97 \pm 0.04$  in the pairwise correlations between all thermal variables for each  
309 site and microhabitat type). Temperatures were higher in the O than C microhabitats at both  
310 sites. The difference was especially pronounced at the soil surface, where soils in the O  
311 microhabitats were a mean of  $10.1 \pm 6.9$  °C warmer (Fig. 1A, B) and drier (Fig. 1C, D). Soil

312 humidity in the O microhabitats markedly decreased as summer temperatures increased, but  
313 the trends of soil humidity were more stable in the C microhabitats.

314 Individuals of both host-plant species began to reproduce earlier in spring and in larger  
315 proportions in the O than the C microhabitats (Figs. 1E, F and S4). More closed (C and SC)  
316 microhabitats completely inhibited the onset of flowering of the sun-adapted species, *L. draba*,  
317 at the lowland site (Figs. 1F and S4). Consistent with these phenological observations, total stem  
318 length was stabilized earlier in the O microhabitats, leading to shorter mature plants (Fig. 1G,  
319 H). Foliar water and chlorophyll contents decreased in both host plants (Fig. 1I–L) as they  
320 senesced after fructification during late spring and early summer (Julian days 140–180) (Figs. 1E,  
321 F and S4). Only non-flowering first-year rosettes (*A. petiolata*) and summer rhizome resprouts  
322 (*L. draba*) remained in midsummer after senescence (Fig. 1G, H). First-year rosettes of *A.*  
323 *petiolata* notably coexisted in June with the reproductive stage of second-year individuals, which  
324 remained green (Figs. 1G, I, K and S4). In contrast, there was no temporal overlap between  
325 reproductive *L. draba* plants and new summer resprouts, which did not appear until mid-July.  
326 The complete senescence of *L. draba* individuals in late June thus led to a period of scarcity of  
327 fresh host plants for 2–3 weeks until the emergence of midsummer resprouts in mid-July (Figs.  
328 1H, J, L and S4). The abundances of the two *Pieris* butterfly species peaked at both sites when  
329 the dominant host plants were experiencing these changes in late spring and early summer (Fig.  
330 1M, N). The abundance of the next butterfly generations at the lowland site decreased sharply  
331 after the peak, coinciding with the period of *L. draba* scarcity (Fig. 1N).

332           b. Microclimatic and host-plant variation across open–closed ecotones (objective *ii*)

333 The variation of the microclimates and host-plant traits were significantly associated with the  
334 open–closed ecotones (Fig. 2 and Table S4). Temperatures were significantly higher in the O and  
335 SO than the C and SC microhabitats, as suggested in the previous section. Upper foliar  
336 temperatures averaged 5 °C higher in the O microhabitats, reaching or exceeding the maximum  
337 environmental thermal records (Fig. 2A–D). Foliar thermal amplification was more pronounced  
338 at the lowland site than in mid-elevation areas (Fig. 2C, D), even though environmental  
339 temperatures were lower at the lowland than the mid-elevation site (Fig. 2A, B; note that the  
340 grey shaded areas in the panels depict the distribution of maximum daily environmental  
341 temperatures). Foliar temperature at the lowland site reached 40 °C, surpassing values that  
342 could affect the survival of *Pieris* larvae, based on the analyses of the heat tolerance experiments  
343 (TE6h in Figs. 2B and S5 and Text S2). In sharp contrast, differences between foliar temperatures  
344 and maximum daily records were  $\leq 0$  °C at the mid-elevation site (Fig. 2C), where critical thermal

345 limits were rarely surpassed (TE6h in Fig. 2A). Soils were significantly drier in the O microhabitats  
346 (Fig. 2E, F). The plants flowered earlier in the O microhabitats (Fig. 2G, H), consistent with the  
347 reported differences in microclimatic conditions and phenological trends analysed in Figs. 1E, F  
348 and S4. The host plants in these microhabitats were significantly shorter (Fig. 2I, J), with smaller  
349 leaves (Fig. 2K, L) that had lower ratios of water content (i.e. less water  $\text{mg}^{-1}$  foliar DW, Fig. 2M,  
350 N). This was accompanied by denser leaves at the lowland but not at the mid-elevation site,  
351 where foliar density was highest in the SO microhabitats (Fig. 2O, P). Foliar chlorophyll content  
352 had opposite spatial patterns at the two sites (Fig. 2Q, R). Chlorophyll content for *L. draba*, the  
353 dominant and sun-adapted host plant at the lowland site, was highest in the O microhabitat and  
354 lowest in the C microhabitat (Fig. 2R). On the contrary, chlorophyll content for *A. petiolata*  
355 (shade-adapted) at the mid-elevation site was lowest in the most open microhabitat (Fig. 2Q).

356 Variation of fruit production across the open–closed ecotones closely paralleled the contrasting  
357 patterns of foliar chlorophyll content between host plants (Fig. 3A, B). Fruit production for *A.*  
358 *petiolata* was highest in the SO, SC, and C microhabitats and was much lower in the O  
359 microhabitats (Fig. 3A). In contrast, sexual reproduction for *L. draba* was completely inhibited in  
360 the C and SC microhabitats, but fruit production was high in the O and SO microhabitats (Fig.  
361 3B). The vegetative production of summer resprouts of *L. draba* was significantly affected by the  
362 conditions in the open–closed ecotones, showing the highest density of resprouts and total  
363 number of leaves in the O microhabitats (Fig. 3C, D).

364 c. Seasonal variation of the spatial patterns across the open–closed ecotones  
365 (objective *iii*)

366 The microclimatic differences between the ecotone microhabitats remained significant across  
367 seasons (from spring to autumn) (Figs. 4, S6, S7 and Table S5). Temperatures at both sites were  
368 significantly higher in the O and SO microhabitats in all seasons (Fig. 4A–H). Foliar temperatures  
369 for *A. petiolata* in the C and SC microhabitats were particularly buffered relative to the highest  
370 environmental temperatures in summer (Fig. 4I–L). In contrast, foliar temperatures for *L. draba*  
371 were significantly amplified relative to maximum environmental temperatures, especially in the  
372 O and SO microhabitats (Fig. 4M–P). Foliar thermal amplification led temperatures to sufficiently  
373 high values to affect larval survival in all seasons in the O microhabitats at the lowland site (Fig.  
374 4E–H), whereas this critical thermal limit was only surpassed in midsummer at the mid-elevation  
375 site (Fig. 4C). Overall, the open–closed ecotone structure largely determined the thermal  
376 buffering and amplification processes that operated in the host-plant microhabitats, modifying  
377 their thermal exposure.

378 Foliar water and chlorophyll contents, which are key plant traits for the selection of butterfly  
379 oviposition sites (Gibbs & Van Dyck, 2009; Myers, 1985; Stefanescu, Peñuelas, Sardans, & Filella,  
380 2006; Wolfson, 1980), also varied significantly across the open–closed ecotones (Fig. 4Q–FF).  
381 Their spatial variation was especially pronounced in spring plants of both host-plant species (Fig.  
382 4Q, U, Y, CC). As previously stated, foliar water content was similar in both host-plant species  
383 (i.e. lower spring contents in the O and SO microhabitats, Fig. 4Q, U), whereas foliar chlorophyll  
384 content varied in opposite directions (i.e. contents in O microhabitats were lowest for *A.*  
385 *petiolata* but highest for *L. draba*, Fig. 4Y, CC). The decreases in foliar water and chlorophyll  
386 contents during plant senescence were larger for *L. draba*.

387 d. Microhabitat selection during oviposition for the two *Pieris* species in the open–  
388 closed ecotones (objective *iv*)

389 Both *P. napi* and *P. rapae* distributed their eggs unequally across the open–closed ecotones.  
390 Furthermore, the microhabitats selected by females for oviposition differed significantly  
391 between the two butterfly species (microhabitat × species  $p = 0.0002$ , GLMM analysis; Table 2).  
392 *Pieris napi* laid more eggs on host plants distributed across the SO and SC microhabitats (jointly  
393 termed *intermediate open–closed microhabitats*, hereafter OC). In sharp contrast, *P. rapae*  
394 mainly laid eggs in the O microhabitats (Fig. 5A, B). Temperatures during oviposition were  
395 significantly lower in the OC microhabitats than in open areas (Fig. 5C, D), where thermal  
396 amplification was more severe (Fig. 5E, F). Foliar temperature during oviposition was accordingly  
397 higher in the leaves selected by *P. rapae* (Fig. 5G). Ovipositing females were predicted to be  
398 more numerous between 13:00 and 15:00 (Fig. 5H). Consistent with these results, the heat  
399 tolerance experiments indicated that *P. rapae* was more thermotolerant (i.e. their larvae were  
400 more tolerant of intense thermal stresses, Fig. S5 and Text S2).

401

#### 402 4. DISCUSSION

403 Forest development is a key element of landscape engineering by the modification of  
404 surrounding physical conditions and resource abundance (Jones, Lawton, & Shachak, 1994). Our  
405 results indicated that multiple biotic and abiotic parameters, such as microclimatic  
406 heterogeneity, understorey host-plant variation, and butterfly ovipositing behaviour, were  
407 structured paralleling the gradients of vegetation cover across the open–closed ecotones. The  
408 O and SO microhabitats were significantly warmer, drier, and more exposed to thermal  
409 amplification that could elevate temperatures to values affecting larval survival (Figs. 1A–D, 2A–  
410 F, 4A–P, and S5). In contrast, C microhabitats benefitted from the buffering provided by the

411 canopy cover, especially at the mid-elevation site 1 where the forest was more developed.  
412 Temperatures were thus lower, soil humidity was higher, and temporal dynamics were  
413 smoother there. Variation in the microhabitat structure across ecotones not only affected  
414 microclimatic conditions but also influenced all host-plant traits. The reproductive phenology of  
415 the host plants was advanced in the O microhabitats, and the plants were shorter and had  
416 smaller leaves with lower water contents (Figs. 1E–J, 2G–N, and 4Q–X). Other traits such as foliar  
417 chlorophyll content and reproductive output, however, had opposite patterns of spatial  
418 variation between host-plant species, indicating different shade-adaptation strategies. O  
419 microhabitats clearly inhibited the development of *A. petiolata* (shade-adapted), where the  
420 phenotype was less vigorous, with lower chlorophyll content and fruit production. In contrast,  
421 *L. draba* (sun-adapted) could not mature sexually and produced fewer resprouts in the C  
422 microhabitats (Fig. 3).

423 Microhabitat structure also differentially influenced the selection of oviposition sites by the two  
424 sympatric and closely related butterflies, showing separated niches at the microhabitat level.  
425 *Pieris rapae* significantly selected O microhabitats to oviposit, while *P. napi* was more frequently  
426 detected at OC microhabitats. The larvae of *P. rapae* grew thus under completely different  
427 thermal conditions with marked interspecific differences in thermal exposure (in the range of  
428 5–10°C). Fully matching these results, *P. rapae* presented greater tolerance to thermal stress  
429 than *P. napi*. Friberg & Wiklund (2019) recently found that these two butterfly species in nature  
430 selected different plant species on which to lay their eggs but had similar host preferences under  
431 laboratory conditions. These results suggested that habitat choice for oviposition could precede  
432 host-plant selection. Our study provides further support to the relevant role that habitat  
433 structure can have in oviposition behaviour. The two host-plant species we studied were present  
434 in all microhabitats, but both butterfly species oviposited more frequently on the host plants in  
435 their preferred microhabitats (Fig. 5, Table 2). We hypothesize that ovipositing females possibly  
436 use multiple cues following a spatially structured and hierarchical process: firstly, selecting a  
437 particular microhabitat in response to vegetation cues (e.g. vegetation closure or openness) and,  
438 subsequently, contrasting in the selected microhabitat plant-specific traits in order to choose  
439 between alternative individual plants (look at Friberg, Olofsson, Berger, Karlsson, & Wiklund,  
440 2008; Friberg & Wiklund, 2019, for similar results). In our study, concurrent changes in host-  
441 plant and microclimatic conditions were produced by microhabitat modification. Either  
442 background vegetation, temperature, or host-plant traits associated with quality (such as foliar  
443 chlorophyll and water contents) can influence oviposition behaviour in insects (Gibbs & Van

444 Dyck, 2009; Myers, 1985; Wolfson, 1980). Further experimental studies are therefore required  
445 to quantify how these diverse factors may sequentially influence oviposition decisions.

446 Our study highlights the importance of analysing variation at these finer scales, as recently  
447 indicated (De Frenne et al., 2013, 2019; Pincebourde et al., 2016; Suggitt et al., 2018; Woods et  
448 al., 2015, among others). Multiple and interacting fine-scale processes can simultaneously  
449 operate and modulate the ecological responses of insects to global stressors (Carnicer et al.,  
450 2017). For example, variation in butterfly phenology, host-plant species, microhabitat, and  
451 oviposition behaviour in a study of populations of *Euphydryas editha* (Nymphalidea,  
452 Lepidoptera) in California and southern Oregon produced a geographic mosaic of varying  
453 microclimates and thermal exposures. The spatiotemporal exploitation of this microclimatic  
454 mosaic could therefore potentially confer higher resilience to climate change in this climatically  
455 sensitive species. The site-specific interactions between microclimatic and host-plant variation  
456 across the open–closed ecotones in our study could also have key roles in determining the  
457 vulnerabilities of the butterfly populations to global warming and the increasing impacts of  
458 drought. *Pieris napi* abundance has decreased in the last two decades by more than an order of  
459 magnitude at the lowland site 2 associated with summer rainfall, but has moderately increased  
460 at the mid-elevation site (Carnicer et al., 2019). The main host plant of *P. napi* senesced at the  
461 lowland site during the period of maximum abundance (i.e. the second generation, in June),  
462 which triggered a marked deterioration of host-plant traits associated with quality (Fig. 1J, L, N).  
463 The host plants were then scarce for 2–3 weeks until fresh leaves from new shoots emerged  
464 from resprouting rhizomes (Fig. S4). Resprout densities, with more leaves and chlorophyll,  
465 however, were higher in the lowland O microhabitats, where *P. napi* rarely oviposited (Figs. 3,  
466 4EE, and 5). Summer resprouts in OC microhabitats, which were more frequently selected by *P.*  
467 *napi*, had higher foliar water contents and less thermal stress but low densities and fewer leaves  
468 (Figs. 3, 4G, W, and 5). These results contrast with the scenario at the mid-elevation site, where  
469 high-quality host plants were available throughout the year, especially in the C and OC  
470 microhabitats that benefited from an effective buffering (Figs. 1 and 2). The yearly reduction at  
471 the lowland site of *P. napi* records between consecutive generations after peak abundance may  
472 be associated with the low availability of host plants in the microhabitat selected for laying eggs.  
473 The presence of alternative host-plant species (e.g. *Brassica nigra*) in a fresh stage should be  
474 discarded before confirming this hypothesis. Whether the *P. napi* decadal declines at the  
475 lowland site are caused by an increasing spatial discordance between *P. napi*, host plant and  
476 thermal exposure across ecotones during summer dry periods remains to be assessed, however.

477 The increased impacts of drought linked to climate change and habitat loss in the northwestern  
478 Mediterranean Basin have been negatively associated with the richness (Carnicer et al., 2013;  
479 Stefanescu, Carnicer, & Peñuelas, 2011; Stefanescu, Herrando, & Páramo, 2004), distribution  
480 (Wilson et al., 2005; Wilson, Gutiérrez, Gutiérrez, & Monserrat, 2007), and demographic trends  
481 (Carnicer et al., 2019; Herrando et al., 2019; Melero, Stefanescu, & Pino, 2016; Stefanescu,  
482 Torre, Jubany, & Páramo, 2011; Ubach, Páramo, Gutiérrez, & Stefanescu, 2019) of butterfly  
483 species. The abandonment of traditional land uses in recent decades has profoundly modified  
484 Mediterranean landscapes, promoting substantial forest expansion at the expense of semi-  
485 natural grassland and scrub (Debussche, Lepart, & Dervieux, 1999). These land-cover trends  
486 represent an important threat to most of the butterfly species in Catalonia, because about 90%  
487 of species are more strongly associated with open habitats (Ubach et al., 2019). Indeed, previous  
488 studies have found that vegetation encroachment was the cause of larger population declines  
489 and the more frequent local extinctions of open-habitat butterflies (Herrando et al., 2019;  
490 Melero et al., 2016; Stefanescu, Torre, et al., 2011; Ubach et al., 2019). An increase in the  
491 dominance of closed-habitat species has consistently been reported in many butterfly  
492 communities, especially in the warmer areas of Catalonia (Ubach et al., 2019). We have  
493 demonstrated that open habitats can attain temperatures that could be limiting for more  
494 thermosensitive species. Vegetation encroachment in warm areas might thus benefit them to  
495 the detriment of thermotolerant species, which are likely adapted to these warmer and open  
496 conditions. Ubach et al. (2019) also reported that shifts in butterfly communities towards higher  
497 frequencies of closed-habitat species were less marked in heterogeneous landscapes. Our  
498 results indicate that the variety of microhabitats that arise in landscape mosaics is associated  
499 with both biotic and abiotic variation, permitting the co-occurrence of two closely related  
500 species with similar host-plant use but separated niches at the microhabitat scale. The  
501 preservation of landscape mosaics, avoiding excessive vegetation encroachment, can therefore  
502 be a determinant of insect conservation during global change.

503 Numerous fingerprints of the effects of global climate change have already been identified in  
504 insect populations (Boggs, 2016). Most of the predictive models of the responses of organisms  
505 to climate change are based on correlative approaches that use coarse-grain data. However,  
506 several studies have evidenced the need to adopt a more mechanistic approach incorporating  
507 the processes that generate microclimatic variation at fine-scales ultimately determining the  
508 climatic exposure of organisms (Pincebourde et al., 2016; Suggitt et al., 2018; Woods et al.,  
509 2015). The case documented in our study adds strong support to this idea. Furthermore, it shows  
510 that predictive models including variability at the microhabitat scale should not only consider



511 microclimatic variability but also other biotic and abiotic factors that may vary concurrently,  
512 buffering or exacerbating large-scale stressors.

513

#### 514 ACKNOWLEDGEMENTS

515 Emili Bassols and Francesc Xavier Santaefemia provided support with permission management,  
516 scientific advice and key assistance during field work. Meritxell Garcia, Armand Casadó, Carlos  
517 López, Sofía Cortizas, Joaquim de Gispert, Katarzyna Bartnik and Agnieszka Juszczak contributed  
518 to the field and experimental work. Consorci per a la Protecció i Gestió dels Espais Naturals del  
519 Delta del Llobregat, Parc Natural de la Zona Volcànica de la Garrotxa, and Parc Natural  
520 Aiguamolls de l'Empordà provided logistic support. This research was supported by the Spanish  
521 Ministry of Science and Innovation through a doctoral grant (FPU17/05869).

522

#### 523 REFERENCES

- 524 Bauerfeind, S. S., & Fischer, K. (2013). Increased temperature reduces herbivore host-plant  
525 quality. *Global Change Biology*, *19*(11), 3272–3282. <https://doi.org/10.1111/gcb.12297>
- 526 Bennett, N. L., Severns, P. M., Parmesan, C., & Singer, M. C. (2015). Geographic mosaics of  
527 phenology, host preference, adult size and microhabitat choice predict butterfly resilience  
528 to climate warming. *Oikos*, *124*(1), 41–53. <https://doi.org/10.1111/oik.01490>
- 529 Boggs, C. L. (2016). The fingerprints of global climate change on insect populations. *Current*  
530 *Opinion in Insect Science*, *17*, 69–73. <https://doi.org/10.1016/j.cois.2016.07.004>
- 531 Bolker, B. M. (2015). Linear and generalized linear mixed models. In G. A. Fox, S. Negrete-  
532 Yankelevich, & V. J. Sosa (Eds.), *Ecological Statistics: Contemporary Theory and Application*  
533 (1st ed., pp. 309–334). <https://doi.org/10.1093/acprof:oso/9780199672547.001.0001>
- 534 Bolker, B. M., Brooks, M. E., Clark, C. J., Geange, S. W., Poulsen, J. R., Stevens, M. H. H., & White,  
535 J. S. S. (2009). Generalized linear mixed models: a practical guide for ecology and evolution.  
536 *Trends in Ecology and Evolution*, *24*(3), 127–135.  
537 <https://doi.org/10.1016/j.tree.2008.10.008>
- 538 Bonebrake, T. C., Boggs, C. L., Stamberger, J. A., Deutsch, C. A., & Ehrlich, P. R. (2014). From  
539 global change to a butterfly flapping: biophysics and behaviour affect tropical climate  
540 change impacts. *Proceedings of the Royal Society B: Biological Sciences*, *281*, 20141264.

- 541 Bramer, I., Anderson, B. J., Bennie, J. J., Bladon, A. J., De Frenne, P., Hemming, D. L., ... Gillingham,  
542 P. K. (2018). Advances in Monitoring and Modelling Climate at Ecologically Relevant Scales.  
543 *Advances in Ecological Research*, *58*, 101–161.  
544 <https://doi.org/10.1016/BS.AECR.2017.12.005>
- 545 Carnicer, J., Stefanescu, C., Vila, R., Dincă, V., Font, X., & Peñuelas, J. (2013). A unified framework  
546 for diversity gradients: The adaptive trait continuum. *Global Ecology and Biogeography*,  
547 *22*(1), 6–18. <https://doi.org/10.1111/j.1466-8238.2012.00762.x>
- 548 Carnicer, J., Stefanescu, C., Vives-Inгла, M., López, C., Cortizas, S., Wheat, C. W., ... Peñuelas, J.  
549 (2019). Phenotypic biomarkers of climatic impacts on declining insect populations: A key  
550 role for decadal drought, thermal buffering and amplification effects and host plant  
551 dynamics. *Journal of Animal Ecology*, *88*, 376–391. [https://doi.org/10.1111/1365-](https://doi.org/10.1111/1365-2656.12933)  
552 [2656.12933](https://doi.org/10.1111/1365-2656.12933)
- 553 Carnicer, J., Wheat, C. W., Vives-Inгла, M., Ubach, A., Domingo-Marimón, C., Nylin, S., ...  
554 Peñuelas, J. (2017). Evolutionary responses of invertebrates to global climate change: The  
555 role of life-history trade-offs and multidecadal climate shifts. In S. N. Johnson & H. Jones  
556 (Eds.), *Global Climate Change and Terrestrial Invertebrates* (First, pp. 319–348).  
557 <https://doi.org/10.1002/9781119070894.ch16>
- 558 Cavers, P. B., Heagy, M. I., & Kokron, R. F. (1979). The biology of Canadian weeds. 35. *Alliaria*  
559 *petiolata* (M. Bieb.) Cavara and Grande. *Canadian Journal of Plant Science*, *59*(1), 217–229.  
560 <https://doi.org/10.4141/cjps79-029>
- 561 Chung, Y., Rabe-Hesketh, S., Dorie, V., Gelman, A., & Liu, J. (2013). A nondegenerate penalized  
562 likelihood estimator for variance parameters in multilevel models. *Psychometrika*, *78*(4),  
563 685–709. Retrieved from <http://gllamm.org/>
- 564 de Bolós, O., & Vigo, J. (1990). *Flora dels Països Catalans, II* (First). Barcelona: Barcino.
- 565 De Frenne, P., Rodríguez-Sánchez, F., Coomes, D. A., Baeten, L., Verstraeten, G., Vellend, M., ...  
566 Verheyen, K. (2013). Microclimate moderates plant responses to macroclimate warming.  
567 *Proceedings of the National Academy of Sciences*, *110*(46), 18561–18565.  
568 <https://doi.org/10.1073/pnas.1311190110>
- 569 De Frenne, P., Zellweger, F., Rodríguez-Sánchez, F., Scheffers, B. R., Hylander, K., Luoto, M., ...  
570 Lenoir, J. (2019). Global buffering of temperatures under forest canopies. *Nature Ecology*  
571 *and Evolution*, *3*(5), 744–749. <https://doi.org/10.1038/s41559-019-0842-1>

- 572 Debussche, M., Lepart, J., & Dervieux, A. (1999). Mediterranean Landscape Changes: Evidence  
573 from Old Postcards. *Global Ecology and Biogeography*, *8*(1), 3–15.
- 574 Dennis, R. L. H. (2004). Just how important are structural elements as habitat components?  
575 Indications from a declining lycaenid butterfly with a priority conservation status. *Journal*  
576 *of Insect Conservation*, *8*, 37–45. <https://doi.org/10.1023/B>
- 577 Deutsch, C. A., Tewksbury, J. J., Huey, R. B., Sheldon, K. S., Ghalambor, C. K., Haak, D. C., & Martin,  
578 P. R. (2008). Impacts of climate warming on terrestrial ectotherms across latitude.  
579 *Proceedings of the National Academy of Sciences*, *105*(18), 6668–6672.  
580 <https://doi.org/10.1073/pnas.0709472105>
- 581 Dobrowski, S. Z. (2011). A climatic basis for microrefugia: the influence of terrain on climate.  
582 *Global Change Biology*, *17*(2), 1022–1035. <https://doi.org/10.1111/j.1365->  
583 [2486.2010.02263.x](https://doi.org/10.1111/j.1365-2486.2010.02263.x)
- 584 Francis, A., & Warwick, S. I. (2008). The biology of Canadian weeds. 3. *Lepidium draba* L., *L.*  
585 *chalepense* L., *L. appelianum* Al-Shehbaz (updated). *Canadian Journal of Plant Science*,  
586 *88*(2), 379–401. <https://doi.org/10.4141/CJPS07100>
- 587 Friberg, M., Olofsson, M., Berger, D., Karlsson, B., & Wiklund, C. (2008). Habitat choice precedes  
588 host plant choice - niche separation in a species pair of a generalist and a specialist  
589 butterfly. *Oikos*, *117*(9), 1337–1344. <https://doi.org/10.1111/j.0030-1299.2008.16740.x>
- 590 Friberg, M., & Wiklund, C. (2019). Host preference variation cannot explain microhabitat  
591 differentiation among sympatric *Pieris napi* and *Pieris rapae* butterflies. *Ecological*  
592 *Entomology*, *44*(4), 571–576. <https://doi.org/10.1111/een.12728>
- 593 Gibbs, M., & Van Dyck, H. (2009). Reproductive plasticity, oviposition site selection, and  
594 maternal effects in fragmented landscapes. *Behavioral Ecology and Sociobiology*, *64*(1), 1–  
595 11. <https://doi.org/10.1007/s00265-009-0849-8>
- 596 Herrando, S., Titeux, N., Brotons, L., Anton, M., Ubach, A., Villero, D., ... Stefanescu, C. (2019).  
597 Contrasting impacts of precipitation on Mediterranean birds and butterflies. *Scientific*  
598 *Reports*, *9*(1), 5680. <https://doi.org/10.1038/s41598-019-42171-4>
- 599 Hindle, B. J., Kerr, C. L., Richards, S. A., & Willis, S. G. (2015). Topographical variation reduces  
600 phenological mismatch between a butterfly and its nectar source. *Journal of Insect*  
601 *Conservation*, *19*(2), 227–236. <https://doi.org/10.1007/s10841-014-9713-x>
- 602 Hoegh-Guldberg, O., Jacob, D., Taylor, M., Bindi, M., Brown, S., Camilloni, I., ... Zhou, G. (2018).

- 603 Impacts of 1.5°C Global Warming on Natural and Human Systems. In V. Masson-Delmotte,  
604 P. Zhai, H.-O. Pörtner, D. Roberts, J. Skea, P. R. Shukla, ... T. Waterfield (Eds.), *Global*  
605 *Warming of 1.5 °C. An IPCC special report on the impacts of global warming of 1.5 °C above*  
606 *pre-industrial levels and related global greenhouse gas emission pathways, in the context*  
607 *of strengthening the global response to the threat of climate chang.*  
608 <https://doi.org/10.1002/ejoc.201200111>
- 609 IPCC. (2014). *Climate Change 2014: Impacts, Adaptation, and Vulnerability. Part A: Global and*  
610 *Sectoral Aspects. Contribution of Working Group II to the Fifth Assessment Report of the*  
611 *Intergovernmental Panel on Climate Change.* Cambridge, UK and New York, USA.
- 612 Jones, C. G., Lawton, J. H., & Shachak, M. (1994). Organisms as Ecosystem Engineers. *Oikos*,  
613 69(3), 373–386. <https://doi.org/10.2307/3545850>
- 614 Kearney, M. R., Shine, R., & Porter, W. P. (2009). The potential for behavioral thermoregulation  
615 to buffer “cold-blooded” animals against climate warming. *Proceedings of the National*  
616 *Academy of Sciences*, 106(10), 3835–3840. <https://doi.org/10.1073/pnas.0808913106>
- 617 Lenoir, J., Graae, B. J., Aarrestad, P. A., Alsos, I. G., Armbruster, W. S., Austrheim, G., ... Svenning,  
618 J.-C. (2013). Local temperatures inferred from plant communities suggest strong spatial  
619 buffering of climate warming across Northern Europe. *Global Change Biology*, 19(5), 1470–  
620 1481. <https://doi.org/10.1111/gcb.12129>
- 621 Lenth, R. (2019). *emmeans: Estimated Marginal Means, aka Least-Squares Means*. Retrieved  
622 from <https://cran.r-project.org/package=emmeans>
- 623 Melero, Y., Stefanescu, C., & Pino, J. (2016). General declines in Mediterranean butterflies over  
624 the last two decades are modulated by species traits. *Biological Conservation*, 201, 336–  
625 342. <https://doi.org/10.1016/j.biocon.2016.07.029>
- 626 Merckx, T., Serruys, M., & Van Dyck, H. (2015). Anthropogenic host plant expansion leads a  
627 nettle-feeding butterfly out of the forest: consequences for larval survival and  
628 developmental plasticity in adult morphology. *Evolutionary Applications*, 8(4), 363–372.  
629 <https://doi.org/10.1111/eva.12249>
- 630 Moritz, C., & Agudo, R. (2013). The future of species under climate change: resilience or decline?  
631 *Science*, 341(6145), 504–508. <https://doi.org/10.1126/science.1237190>
- 632 Myers, J. H. (1985). Effect of Physiological Condition of the Host Plant on the Ovipositional  
633 Choice of the Cabbage White Butterfly, *Pieris rapae*. *Journal of Animal Ecology*, 54(1), 193–

- 634 204. Retrieved from <https://www.jstor.org/stable/4630>
- 635 Parmesan, C. (2006). Ecological and Evolutionary Responses to Recent Climate Change. *Annual*  
636 *Review of Ecology, Evolution, and Systematics*, 37(1), 637–669.  
637 <https://doi.org/10.1146/annurev.ecolsys.37.091305.110100>
- 638 Parmesan, C., & Yohe, G. (2003). A globally coherent fingerprint of climate change impacts  
639 across natural systems. *Nature*, 421(6918), 37–42. <https://doi.org/10.1038/nature01286>
- 640 Pincebourde, S., Murdock, C. C., Vickers, M., & Sears, M. W. (2016). Fine-scale microclimatic  
641 variation can shape the responses of organisms to global change in both natural and urban  
642 environments. *Integrative and Comparative Biology*, 56(1), 45–61.  
643 <https://doi.org/10.1093/icb/icw016>
- 644 Pollard, E., & Yates, T. J. (1993). Monitoring Butterflies for Ecology and Conservation. In *The*  
645 *Journal of Applied Ecology* (Vol. 32). <https://doi.org/10.2307/2404667>
- 646 R Core Team. (2019). *R: A Language and Environment for Statistical Computing*. Retrieved from  
647 <https://www.r-project.org/>
- 648 Rezende, E. L., Castañeda, L. E., & Santos, M. (2014). Tolerance landscapes in thermal ecology.  
649 *Functional Ecology*, 28(4), 799–809. <https://doi.org/10.1111/1365-2435.12268>
- 650 Scheffers, B. R., De Meester, L., Bridge, T. C. L., Hoffmann, A. A., Pandolfi, J. M., Corlett, R. T., ...  
651 Watson, J. E. M. (2016). The broad footprint of climate change from genes to biomes to  
652 people. *Science*, 354(6313), aaf7671. <https://doi.org/10.1126/science.aaf7671>
- 653 Scherrer, D., & Körner, C. (2010). Infra-red thermometry of alpine landscapes challenges climatic  
654 warming projections. *Global Change Biology*, 16(9), 2602–2613.  
655 <https://doi.org/10.1111/j.1365-2486.2009.02122.x>
- 656 Singmann, H., Bolker, B., Westfall, J., & Aust, F. (2019). *afex: Analysis of Factorial Experiments*.  
657 Retrieved from <https://cran.r-project.org/package=afex>
- 658 Stefanescu, C. (2000). El Butterfly Monitoring Scheme en Catalunya: Los primeros cinco años.  
659 *Treballs de La Societat Catalana de Lepidopterologia*, 15, 5–48.
- 660 Stefanescu, C., Carnicer, J., & Peñuelas, J. (2011). Determinants of species richness in generalist  
661 and specialist Mediterranean butterflies: The negative synergistic forces of climate and  
662 habitat change. *Ecography*, 34(3), 353–363. [https://doi.org/10.1111/j.1600-](https://doi.org/10.1111/j.1600-0587.2010.06264.x)  
663 [0587.2010.06264.x](https://doi.org/10.1111/j.1600-0587.2010.06264.x)

- 664 Stefanescu, C., Herrando, S., & Páramo, F. (2004). Butterfly species richness in the north-west  
665 Mediterranean Basin: the role of natural and human- .... *Journal of Biogeography*, 31(6),  
666 905–915. <https://doi.org/10.1111/j.1365-2699.2004.01088.x>
- 667 Stefanescu, C., Peñuelas, J., Sardans, J., & Filella, I. (2006). Females of the specialist butterfly  
668 *Euphydryas aurinia* (Lepidoptera: Nymphalinae: Melitaeini) select the greenest leaves of  
669 *Lonicera implexa* (Caprifoliaceae) for oviposition. *European Journal of Entomology*, 103(3),  
670 569–574. <https://doi.org/10.14411/eje.2006.077>
- 671 Stefanescu, C., Torre, I., Jubany, J., & Páramo, F. (2011). Recent trends in butterfly populations  
672 from north-east Spain and Andorra in the light of habitat and climate change. *Journal of*  
673 *Insect Conservation*, 15(1), 83–93. <https://doi.org/10.1007/s10841-010-9325-z>
- 674 Suggitt, A. J., Wilson, R. J., Isaac, N. J. B., Beale, C. M., Auffret, A. G., August, T. A., ... Maclean, I.  
675 M. D. (2018). Extinction risk from climate change is reduced by microclimatic buffering.  
676 *Nature Climate Change*, 8(8), 713–717. <https://doi.org/10.1038/s41558-018-0231-9>
- 677 Sunday, J. M., Bates, A. E., Kearney, M. R., Colwell, R. K., Dulvy, N. K., Longino, J. T., & Huey, R.  
678 B. (2014). Thermal-safety margins and the necessity of thermoregulatory behavior across  
679 latitude and elevation. *Proceedings of the National Academy of Sciences*, 111(15), 5610–  
680 5615. <https://doi.org/10.1073/pnas.1316145111>
- 681 Ubach, A., Páramo, F., Gutiérrez, C., & Stefanescu, C. (2019). Vegetation encroachment drives  
682 changes in the composition of butterfly assemblages and species loss in Mediterranean  
683 ecosystems. *Insect Conservation and Diversity*, icad.12397.  
684 <https://doi.org/10.1111/icad.12397>
- 685 Urban, M. C. (2015). Accelerating extinction risk from climate change. *Science*, 348(6234), 571–  
686 573. <https://doi.org/10.1126/science.aaa4984>
- 687 Vila, R., Stefanescu, C., & Sesma, J. M. (2018). *Guia de les papallones diürnes de Catalunya* (First).  
688 Bellaterra: Lynx Edicions.
- 689 Walther, G.-R., Post, E., Convey, P., Menzel, A., Parmesan, C., Beebee, T. J. C., ... Bairlein, F.  
690 (2002). Ecological responses to recent climate change. *Nature*, 416(6879), 389–395.  
691 <https://doi.org/10.1038/416389a>
- 692 Wilson, R. J., Gutiérrez, D., Gutiérrez, J., Martínez, D., Agudo, R., & Monserrat, V. J. (2005).  
693 Changes to the elevational limits and extent of species ranges associated with climate  
694 change. *Ecology Letters*, 8(11), 1138–1146. <https://doi.org/10.1111/j.1461->

695 0248.2005.00824.x

696 Wilson, R. J., Gutiérrez, D., Gutiérrez, J., & Monserrat, V. J. (2007). An elevational shift in butterfly  
697 species richness and composition accompanying recent climate change. *Global Change*  
698 *Biology*, 13(9), 1873–1887. <https://doi.org/10.1111/j.1365-2486.2007.01418.x>

699 Wolfson, J. L. (1980). Oviposition response of *Pieris rapae* to environmentally induced variation  
700 in *Brassica nigra*. *Entomologia Experimentalis et Applicata*, 27(3), 223–232.  
701 <https://doi.org/10.1111/j.1570-7458.1980.tb02969.x>

702 Woods, H. A., Dillon, M. E., & Pincebourde, S. (2015). The roles of microclimatic diversity and of  
703 behavior in mediating the responses of ectotherms to climate change. *Journal of Thermal*  
704 *Biology*, 54, 86–97. <https://doi.org/10.1016/j.jtherbio.2014.10.002>

705 Zuur, A. F., Ieno, E. N., Walker, N. J., Saveliev, A. A., & Smith, G. M. (2009). *Mixed Effects Models*  
706 *and Extensions in Ecology with R* (M. Gail, K. Krickeberg, J. Samet, A. Tsiatis, & W. Wong,  
707 Eds.). <https://doi.org/10.1007/978-0-387-87458-6>

708

709 **Table 1.** Summary of the 21 variables measured during microclimatic and host-plant monitoring.

710

| Type                                                             | Variable                                         | Number of measurements per day | Measured species (site)                                 | Period of measurement (frequency) |
|------------------------------------------------------------------|--------------------------------------------------|--------------------------------|---------------------------------------------------------|-----------------------------------|
| Microclimatic conditions                                         | 1. Soil moisture                                 | 36                             | <i>A. petiolata</i> (site 1) & <i>L. draba</i> (site 2) | March–October (every two weeks)   |
|                                                                  | 2. Soil temperature [at a depth of 10 cm]        | 12                             |                                                         |                                   |
|                                                                  | 3. Soil surface temperature [exposed to sun]     |                                |                                                         |                                   |
|                                                                  | 4. Soil surface temperature [protected from sun] |                                |                                                         |                                   |
|                                                                  | 5. Microhabitat air temperature [1 m]            |                                |                                                         |                                   |
|                                                                  | 6. Foliar temperature [upper surface]            | 36                             |                                                         |                                   |
|                                                                  | 7. Foliar temperature [lower surface]            |                                |                                                         |                                   |
| Host-plant phenological, morphological, and physiological traits | 8. Phenological stage                            | 60                             | <i>A. petiolata</i> (site 1) & <i>L. draba</i> (site 2) | March–October (every two weeks)   |
|                                                                  | 9. Stem length                                   | 12                             |                                                         |                                   |
|                                                                  | 10. Foliar length                                | 36                             |                                                         |                                   |
|                                                                  | 11. Foliar width                                 |                                |                                                         |                                   |
|                                                                  | 12. Foliar chlorophyll content                   | 108                            |                                                         |                                   |
|                                                                  | 13. Foliar fresh weight                          | 24                             |                                                         |                                   |
|                                                                  | 14. Foliar dry weight                            |                                |                                                         |                                   |
|                                                                  | 15. Foliar water content                         |                                |                                                         |                                   |
| 16. Foliar density                                               |                                                  |                                |                                                         |                                   |
| Host-plant reproductive output                                   | 17. Number of fruits                             | 40                             | <i>A. petiolata</i> (site 1) & <i>L. draba</i> (site 2) | June (once)                       |
|                                                                  | 18. Silique length                               | 40                             | <i>A. petiolata</i> (site 1)                            |                                   |
|                                                                  | 19. Resprout density                             | 20                             | <i>L. draba</i> (site 2)                                | July–October (every two weeks)    |
|                                                                  | 20. Resprout height                              | 24                             |                                                         |                                   |
|                                                                  | 21. Number of leaves per resprout                |                                |                                                         |                                   |



711 **Table 2.** Generalized linear mixed model of the number of ovipositing female butterflies. Results  
712 from the parametric bootstrap test of the fixed effects.

| Fixed effect                | $\chi^2$ | df | p      |
|-----------------------------|----------|----|--------|
| Microhabitat type           | 9.27     | 2  | 0.0097 |
| Species                     | 0.19     | 1  | 0.6652 |
| Census duration             | 0.67     | 1  | 0.4131 |
| Microhabitat type × species | 17.14    | 2  | 0.0002 |

713

714 **Figure 1.** Seasonal patterns of variation of microclimatic conditions (A–D), host-plant  
 715 phenological (E and F) and morphological and physiological traits (G–L), and butterfly phenology  
 716 (M and N). The assessment of host-plant morphological and physiological traits (G–L) separated  
 717 individuals into those that emerged and developed in early spring (spring plants) and those that  
 718 emerged since June (summer rosettes and resprouts). Shaded areas indicate the 95% confidence  
 719 interval around each trend, except for the soil surface temperature, where the shaded areas  
 720 represent the 50% confidence intervals. A summary of the fits of local polynomial regressions  
 721 between the response variables and Julian day is presented in Table S2.

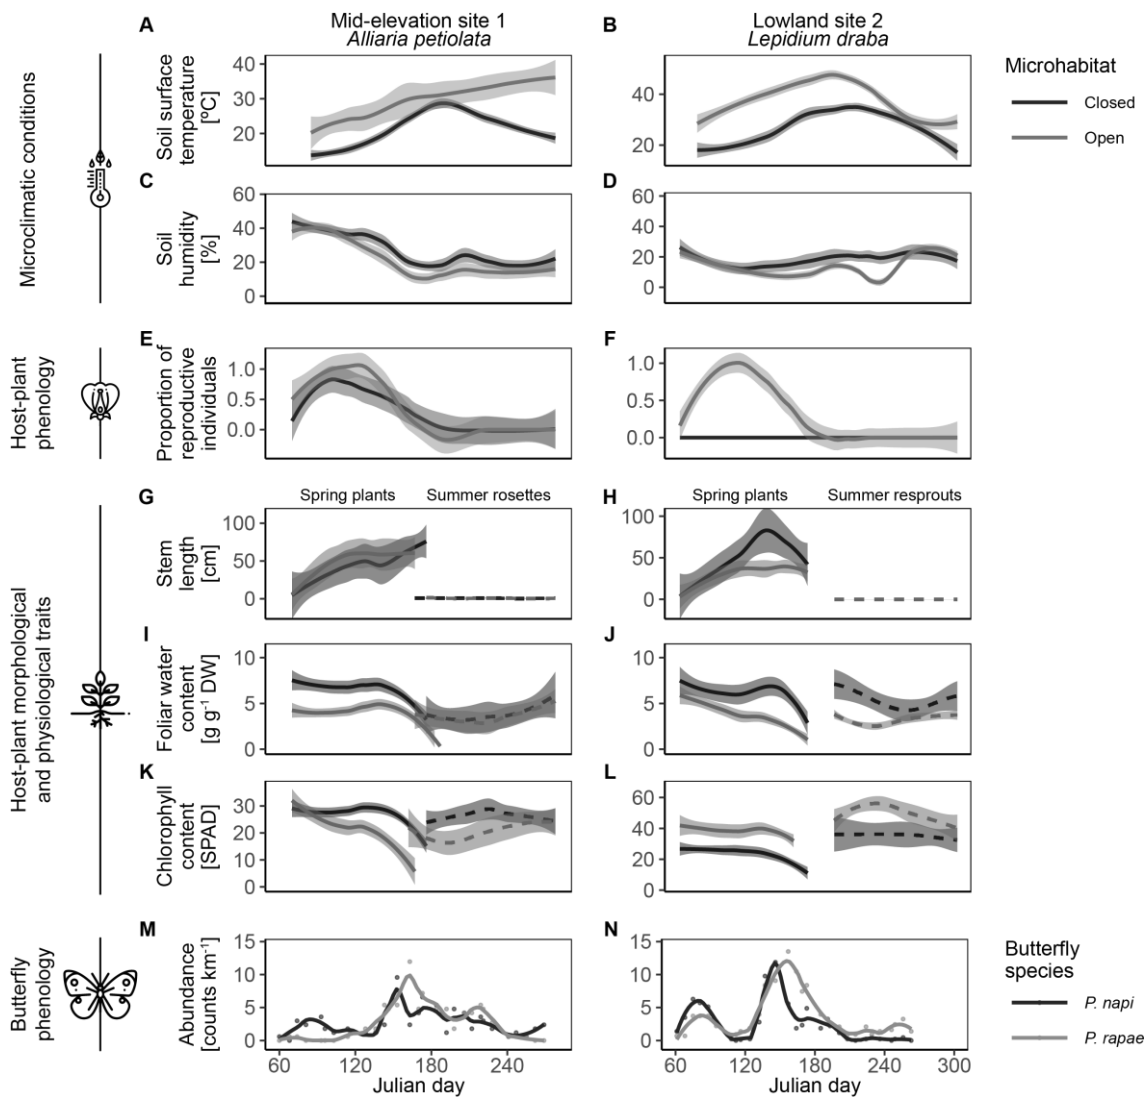

722

723

724 **Figure 2.** Spatial patterns of variation of microclimatic conditions (A–F) and host-plant  
725 phenological (G and H) and morphological and physiological traits (I–R) across the open–closed  
726 ecotones. Different letters indicate significant differences of the response variable between the  
727 microhabitat types in the Tukey HSD test. The grey shaded areas in panels A and B correspond  
728 to the maximum daily temperatures recorded by the local meteorological stations. The dotted  
729 lines correspond to the thermal thresholds that would lead to larval death with a daily exposure  
730 of six hours during the entire developmental period (TE6H) estimated by the heat tolerance  
731 experiments. The horizontal lines in panels C and D indicate foliar temperatures equal to  
732 maximum daily temperature. Positive values correspond to foliar thermal amplification, and  
733 negative values imply thermal buffering. A summary of the results is presented in Table S4. C,  
734 closed microhabitat; SC, semi-closed micrhabitat; SO, semi-open microhabitat; and O, open  
735 microhabitat.

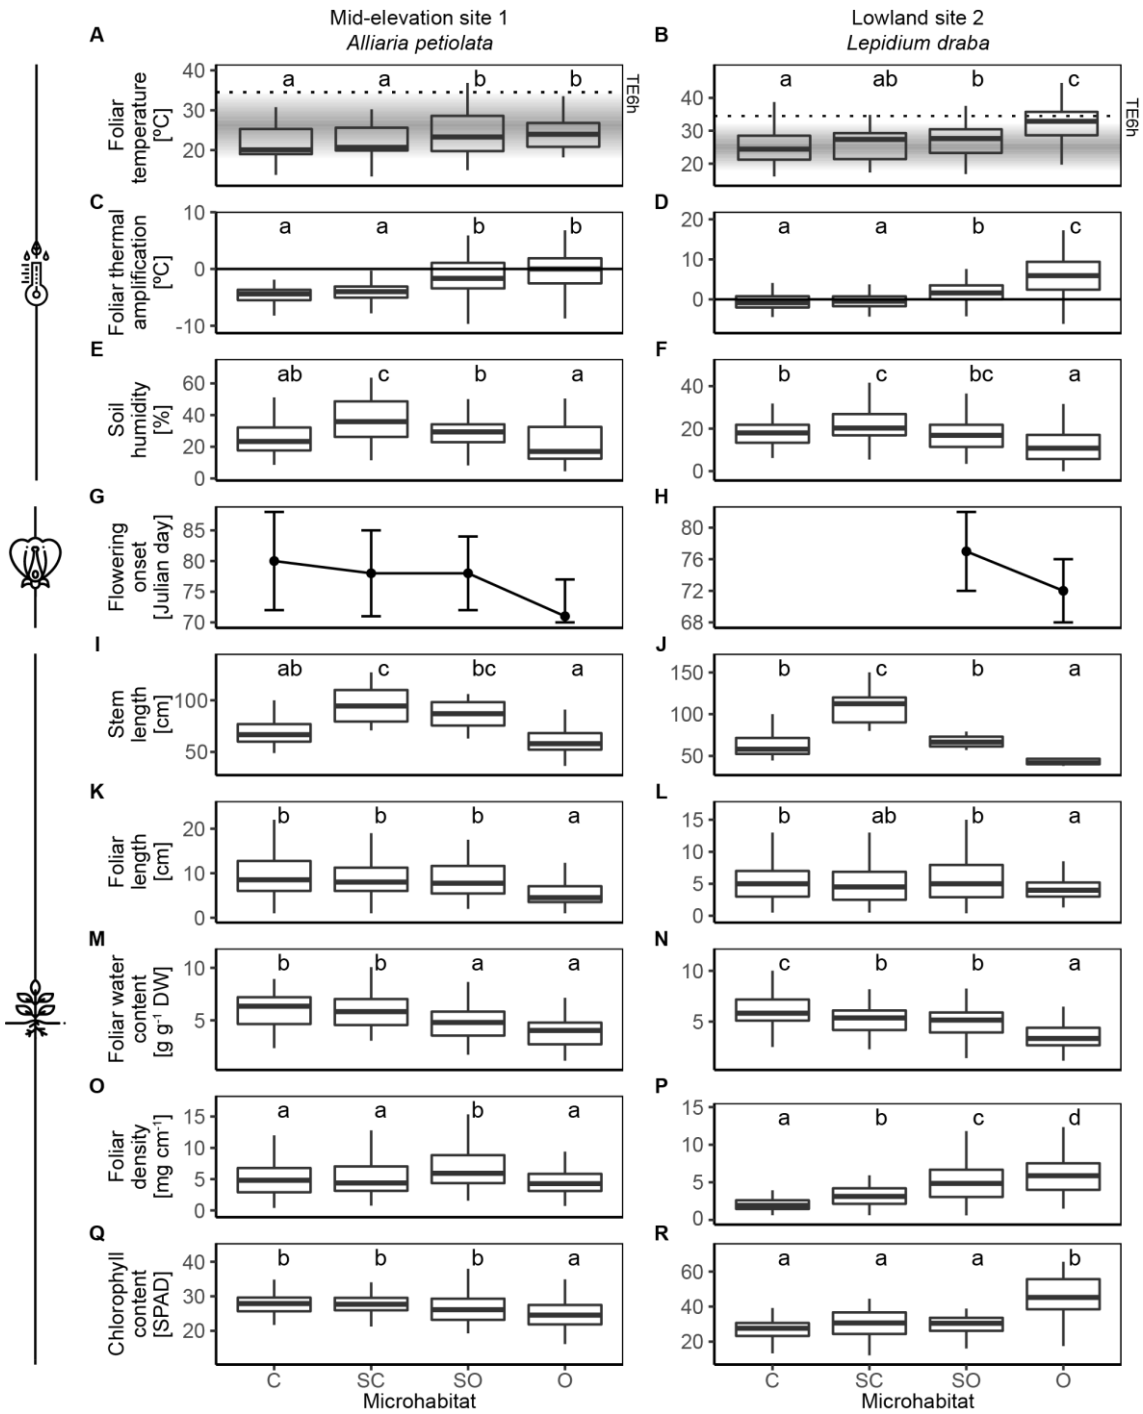

737 **Figure 3.** Variation in the reproductive output of the host plants across the open–closed  
738 ecotones. Different letters indicate significant differences of the response variable between the  
739 microhabitat types in the Tukey HSD test. C, closed microhabitat; SC, semi-closed microhabitat;  
740 SO, semi-open microhabitat; and O, open microhabitat.

741

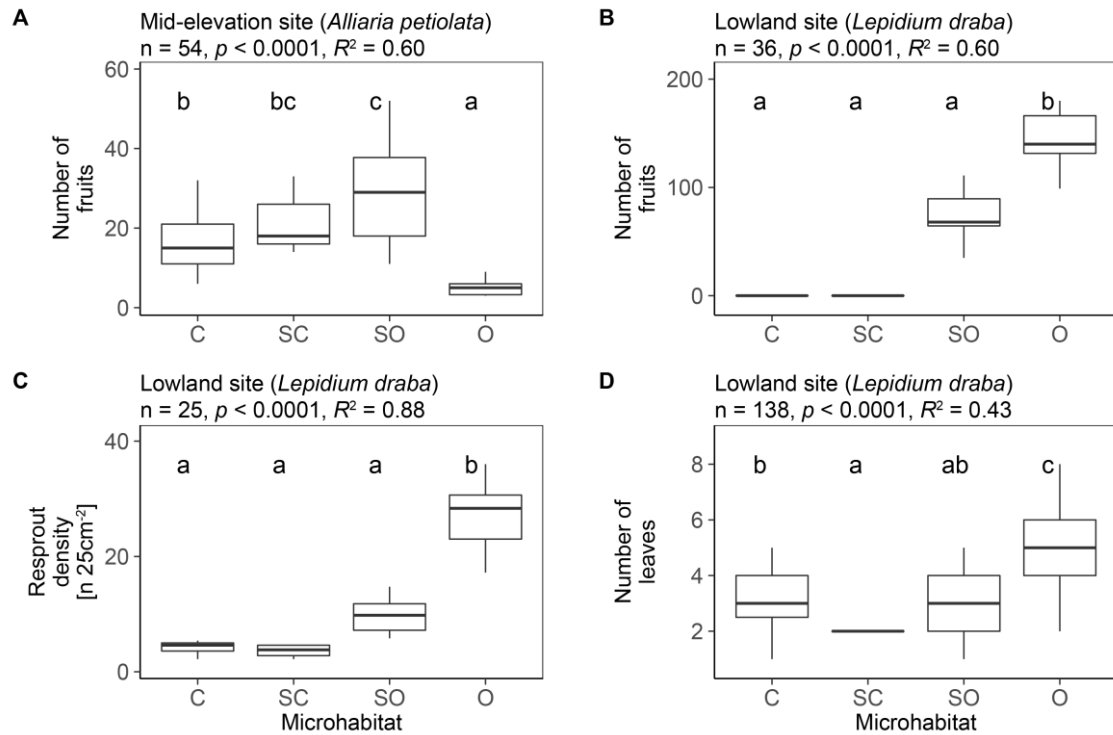

742

743

744 **Figure 4. Seasonal variation of the spatial patterns of variation across open–closed ecotones.**  
745 A–P, microclimatic conditions; Q–FF, host-plant traits. Different letters indicate significant  
746 differences of the response variable between the microhabitat types in the Tukey HSD test. The  
747 dotted lines in panels A–H correspond to the thermal thresholds that would lead to larval death  
748 with a daily exposure of six hours during the entire developmental period (TE6H) estimated by  
749 the heat tolerance experiments. The horizontal solid lines in panels I–P indicate foliar  
750 temperatures equal to the maximum daily temperature. Positive values correspond to foliar  
751 thermal amplification, and negative values imply thermal buffering. No foliar sample was  
752 weighted (panel W), and foliar chlorophyll content was not measured in one case (panel EE),  
753 due to the small number and size of midsummer *Lepidium draba* resprouts in the semi-closed  
754 microhabitat. A summary of the results is presented in Table S5. C, closed microhabitat; SC, semi-  
755 closed microhabitat; SO, semi-open microhabitat; and O, open microhabitat.

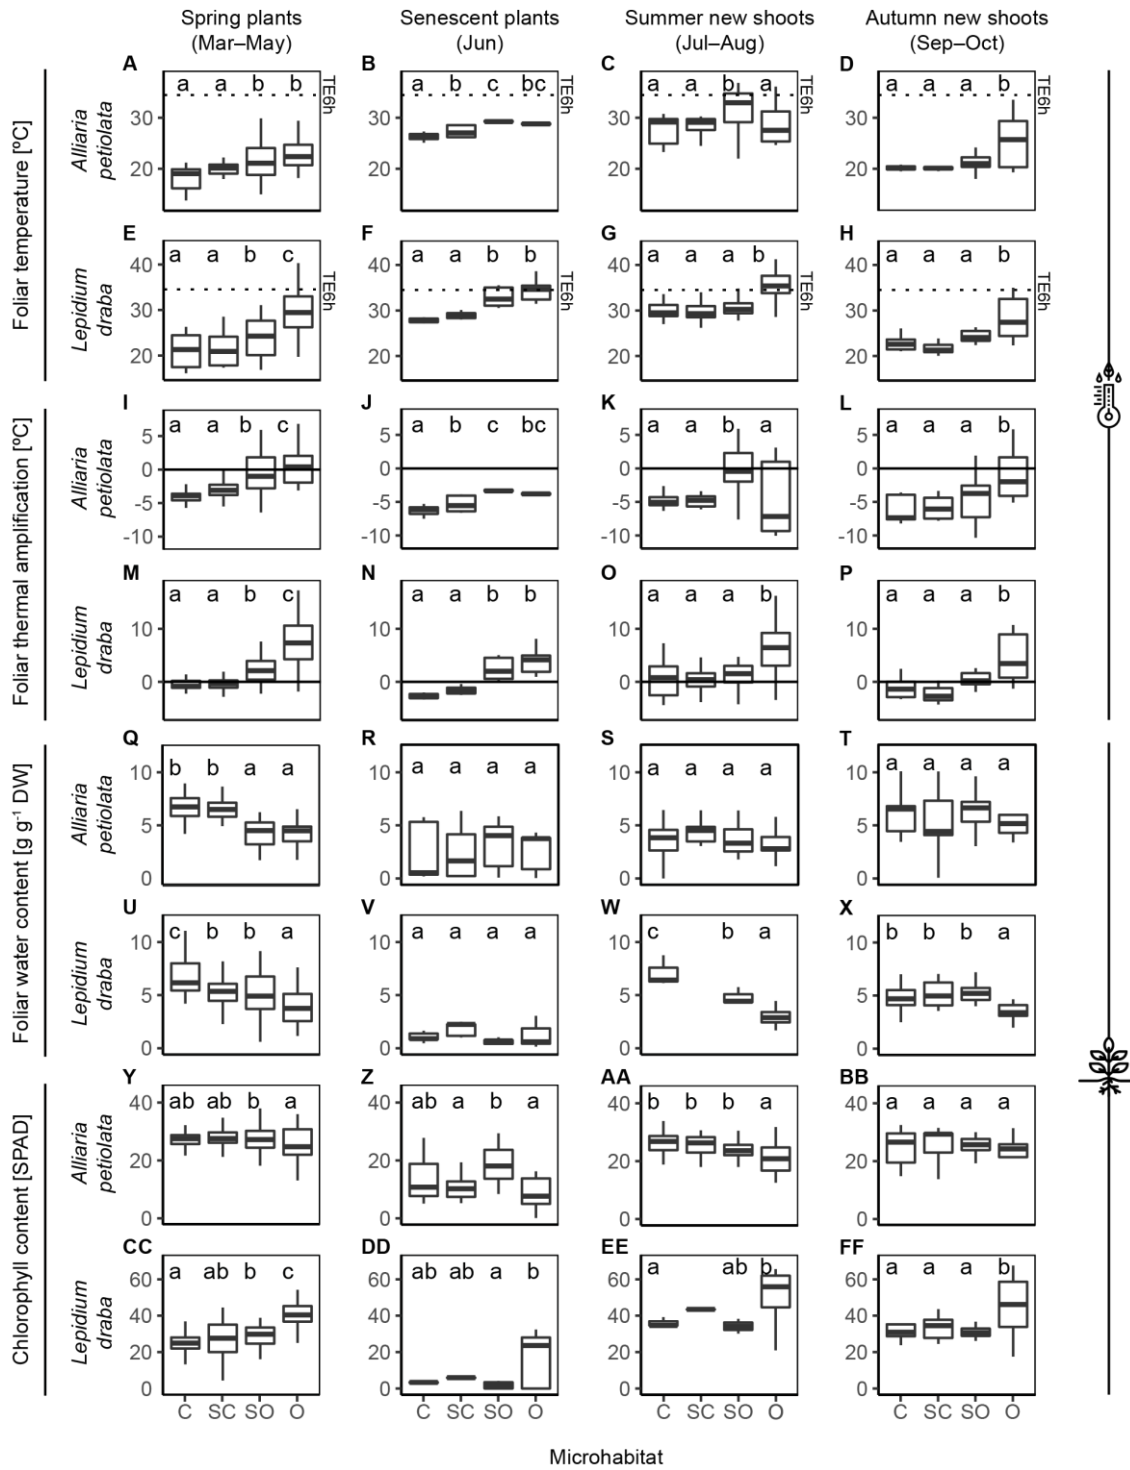

756

757

758 **Figure 5.** Results of the census of oviposition. A and B: distribution of the relative number of  
 759 ovipositions for each species across the open–closed ecotones. C and D: mean summer  
 760 temperature during oviposition (13:00–17:00) recorded by the standalone data loggers. E and  
 761 F: difference between daily mean temperatures from the records of the microenvironmental  
 762 data loggers and the local meteorological stations. G: foliar temperature of the lower surface  
 763 during oviposition. H: predicted distribution of ovipositing females during the day in the GLMM.  
 764

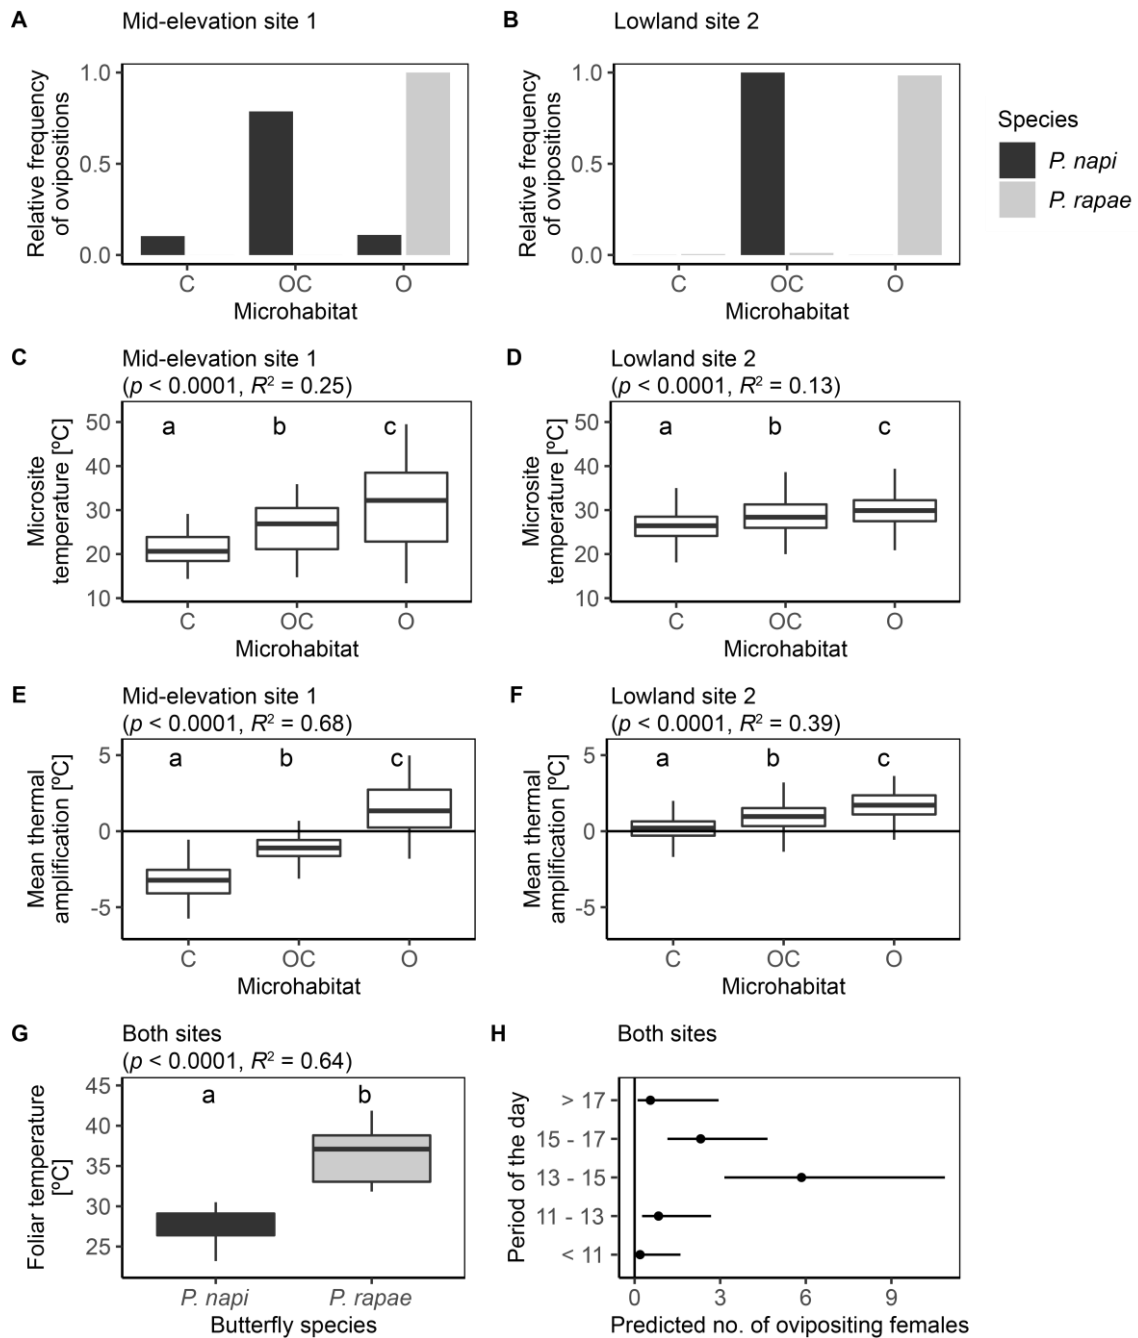

765

766
